1 **Running Title : *OsLUGL* regulating floral development through auxin**  
2 **pathway**

3 **Chunyan Yang • Dianli Li • Xingjie Zhu • Ziyao Wei • Zhiming Feng • Long Zhang • Jun He**  
4 **• Xi Liu • Changling Mou • Ling Jiang <sup>(✉)</sup> and Jianmin Wan <sup>(✉)</sup>**

5

6 ***OsLUGL* involved in floral development through regulating auxin**  
7 **level and *OsARFs* expression in rice (*Oryza sativa* L.)**

8

9 **C.Y. Yang<sup>1</sup> • D.L. Li<sup>1</sup> • X.J. Zhu<sup>1</sup> • Z.Y. Wei<sup>1</sup> • Z.M. Feng<sup>1</sup> • L. Zhang<sup>1</sup> • J. He<sup>1</sup> • X. Liu<sup>1</sup> •**

10 **C.L. Mou<sup>1</sup> • L. Jiang<sup>1, †</sup> • J.M. Wan<sup>1,2, †</sup>**

11

12 <sup>1</sup>*State Key Laboratory for Crop Genetics and Germplasm Enhancement, Jiangsu Plant Gene Engineering*  
13 *Research Center, Nanjing Agricultural University, Nanjing 210095, China, and*

14 <sup>2</sup>*National Key Facility for Crop Resources and Genetic Improvement, Institute of Crop Science, Chinese Academy*  
15 *of Agricultural Sciences, Beijing 100081, China*

16

17 † Corresponding authors:

18 Ling Jiang

19 Telephone: +86-25-84399061

20 Fax: +86-25-84399061

21 E-mail: [jiangling@njau.edu.cn](mailto:jiangling@njau.edu.cn)

22 ORCID iD: <https://orcid.org/0000-0003-1464-5881>

23

24 Jianmin Wan

25 Telephone: +86-25-84396516

26 Fax: +86-25-84396516

27 E-mail: [wanjm@njau.edu.cn](mailto:wanjm@njau.edu.cn)

28 ORCID iD: <https://orcid.org/0000-0002-7813-4362>

29

30 **Highlight**

31 OsLUGL through forming OsLUGL-OsSEU-OsAP1-OsSEP3 complex regulate  
32 *OsGH3-8* expression, and regulate auxin level and *OsARFs* expression indirectly. This  
33 work is a new insight to floral development molecular mechanism.

34

35 **Abstract**

36 Specification of floral organ identity is critical for floral morphology and  
37 inflorescence architecture. Floral organ identity in plants is controlled by floral  
38 homeotic A/B/C/D/E-class genes. Although multiple genes regulate floral  
39 organogenesis our understanding of the regulatory network remains fragmentary. Here,  
40 we characterized rice floral organ gene *KAIKOUXIAO* (*KKX*), mutation of which  
41 produces an uncharacteristic open hull, abnormal seed, and semi-sterility. *KKX*  
42 encodes a putative LEUNIG-like (LUGL) transcriptional co-repressor. *OsLUGL* is  
43 preferentially expressed in young panicles and its protein can interact with OsSEU,  
44 which functions were reported as an adaptor for LEUNIG. OsLUGL-OsSEU  
45 functions together as a transcriptional regulatory complex to control organ identity  
46 specification through regulation of MADS-box genes. During this process, SEP3  
47 (such as OsMADS8) and AP1 (such as OsMADS18) serve as the DNA-binding  
48 partner of OsLUGL-OsSEU complex. Further studies indicated that OsMADS8 and  
49 OsMADS18 could bind the promoter of *OsGH3-8* and regulate its expression. The  
50 altered expression of *OsGH3-8* caused the increased auxin level and the decreased  
51 expression of *OsARFs*. Overall, our results demonstrate a possible pathway whereby  
52 OsLUGL-OsSEU-OsAP1-OsSEP3 complex as a transcriptional regulator by targeting  
53 the promoter of *OsGH3-8* directly, affecting auxin level, *OsARFs* expression level and  
54 thereby influencing floral development. These findings provide a valuable insight into  
55 the molecular functions of OsLUGL in rice floral development.

56

57 **Key words:** rice, OsLUGL, *OsGH*, OsMADSs, floral development, Auxin, *OsARFs*

58

## 59 Introduction

60 Rice (*Oryza sativa* L.) as one of the most important cereal crops feeds more than half  
61 the world population. Given the rapidly increasing population and decreasing  
62 cultivated land area, continued improvements in rice production and quality are  
63 massive challenges for rice breeders (Ikeda *et al.*, 2013). Normal development of  
64 floral organs in rice is essential for reproduction and seed quality (Zhang *et al.*, 2015).  
65 Initiation and differentiation of floral organs are of fundamentally important in the  
66 plant life cycle (Zhang *et al.*, 2007; Fornara *et al.*, 2010). A typical dicot flower  
67 consists of four whorls, intensive molecular and genetic analyses in *Arabidopsis*  
68 *thaliana* and *Antirrhinum majus*, led to the ABCDE model (Coen and Meyerowitz,  
69 1991; Alvarez-Buylla *et al.*, 2010; Litt and Kramer, 2010). The functions of  
70 A/B/C/D/E are to specify the identity of each organ and to control floral meristem  
71 determinacy (Coen and Meyerowitz, 1991; Pelaz *et al.*, 2000; Theissen and Saedler,  
72 2001; Pinyopich *et al.*, 2003; Ditta *et al.*, 2004). Rice is a monocot grass species and  
73 the model plant for functional genomics studies in crop plants; its spikelet  
74 morphogenesis is important for the achievement of yield. Accumulating evidence  
75 shows that the ABCDE model is at least partially applicable to floral development in  
76 rice (Ferrario *et al.*, 2004; Bommert *et al.*, 2005; Thompson and Hake, 2009; Ciaffi *et*  
77 *al.*, 2011; Tanaka *et al.*, 2013; Zhang and Yuan, 2014; Wang *et al.*, 2015; Dreni and  
78 Zhang, 2016;).

79  
80 Many A/B/C/D/E class genes have been identified, and most of them are MADS-box  
81 family genes. Five types of MADS-box genes identified in from *Arabidopsis* are  
82 partially conserved in rice, and these genes are reported to be involved in specification  
83 of floral development. *OsMADS15* is reported as a regulator of palea size (Wang *et al.*,  
84 2010); *OsMADS16* regulate development of lodicules and stamens (Yun *et al.*, 2013);  
85 *OsMADS3* plays a predominant role in stamen specification, whereas *OsMADS58* is  
86 involved in establishing floral meristem determinacy and carpel development (Dreni  
87 *et al.*, 2011; Hu *et al.*, 2011); *OsMADS13* has a key role in specification of ovule

88 identity and floral meristem determination (Dreni and Kater, 2014; Hu *et al.*, 2015).

89

90 Rice has diversified at least five *SEP*-like genes that specify the identities of  
91 four-whorl floral organs, such as *OsMADS1*, *OsMADS5*, *OsMADS7*, *OsMADS8*, and  
92 *OsMADS34* (Malcomber and Kellogg, 2004, 2005; Zahn *et al.*, 2005; Arora *et al.*,  
93 2007; Wu *et al.*, 2018). Loss-of-function *OsMADS1* shows the outer floret organs,  
94 lemma and palea, were narrow, poorly developed, and failed to enclose the inner  
95 organs (Khanday *et al.*, 2013). *osmads7* and *osmads8* exhibit late flowering, homeotic  
96 transformations of lodicules, stamens, and carpels into palea/lemma-like organs, and a  
97 loss of floral determinacy (Cui *et al.*, 2010). *OsMADS6* is *AGL6*-like gene have high  
98 sequence similarities with *SEP*-like genes (Dreni and Zhang, 2016; Callens *et al.*,  
99 2018), in *osmads6*, the palea develops five to six vascular bundles, which resembles  
100 the identity of a wild-type lemma (Li *et al.*, 2010; Dreni and Zhang, 2016).

101

102 In grass reproductive meristems, the phytohormone auxin plays a central role in  
103 almost all developmental and physiological processes, it regulates axillary meristem  
104 initiation and outgrowth by controlling cell polarity establishment and cell elongation  
105 (Zhao, 2010). Auxin responses are mediated by a class of transcription factors known  
106 as *auxin response factors (ARFs)* (Overvoorde *et al.*, 2005; Boer *et al.*, 2014). The  
107 functions of *ARFs* are well studied. Many loss-of-function mutations affecting floral  
108 morphology have been reported in *Arabidopsis thaliana*. For example, *arf1* and *arf2*  
109 affect leaf senescence and floral organ abscission (Ellis *et al.*, 2005); *arf3* displays  
110 defects in the gynoecium and floral meristem patterning (Nishimura *et al.*, 2005;  
111 Zheng *et al.*, 2018). In rice, the transgenic lines expressing an antisense *OsARF1*  
112 showed extremely slow growth, poor vigor, curled leaves, and sterility (Attia *et al.*,  
113 2009). Mutation of *OsARF19* caused abnormal floral organs, and changes to plant  
114 height, leaf shape, and seed size (Zhang *et al.*, 2015).

115

116 *Arabidopsis* LUG was Gro/Tup1-like co-repressor identified in plants; its role is to  
117 regulate transcription of the floral homeotic gene *AGAMOUS (AG)* (Conner and Liu,

118 2000). In loss-of-function mutants of LUG, *AG* is ectopically expressed in the outer  
119 two whorls of the flower, converting sepals into carpelloid floral organs and reducing  
120 the numbers of petals and stamens (Liu and Meyerowitz, 1995). Like other Gro  
121 family members, the N-terminal LUGS domain of LUG is required for repression of  
122 transcription and for direct interaction with SEUSS (SEU), SEU acts as an adaptor  
123 protein, bridging interaction between LUG and specific DNA-binding transcription  
124 factors AP1 and SEP3. The LUG-SEU-AP1-SEP3 complex is directly regulating *AG*  
125 expression in all four whorls in *Arabidopsis* (Sridhar *et al.*, 2004; Gregis *et al.*, 2006;  
126 Sridhar *et al.*, 2006; Sitaraman *et al.*, 2008; Gregis *et al.*, 2009). There is no report on  
127 LUG or its regulatory mechanism in rice.

128

129 Here, we characterize rice floral organ gene *KAIKOUXIAO (KKX)*, mutation of which  
130 causes an uncharacteristic open glume and abnormal seed. *KKX* encodes a putative  
131 LEUNIG-like (LUGL) transcriptional co-repressor. Further analyses revealed that  
132 OsLUGL interacts with OsSEU to become a transcriptional regulated complex.  
133 OsSEU also interacts with OsMADS8 and OsMADS18. Also, we confirmed that  
134 *OsGH3-8* is the downstream target of OsMADS8 and OsMADS18. In *kcx*, the  
135 down-regulated expression of *OsGH3-8* cause high auxin level and altered *OsARFs*  
136 expression. Thus, our results suggest that OsLUGL regulates floral organ  
137 development by forming OsLUGL-OsSEU-OsAP1-OsSEP3 complex, which could  
138 regulate auxin level and signaling directly.

139

## 140 **Materials and methods**

### 141 *Plant materials*

142 The *kkx* mutant was from a M<sub>2</sub> population of <sup>60</sup>Co-irradiated variety Nanjing35  
143 (*Oryza sativa*, L.). The *kkx* was crossed with crossed with the typical *indica* cultivar  
144 93-11 to construct the mapping population. The F<sub>1</sub> seeds of *kkx*×93-11 were sown and  
145 transplanted as individual plants to generate the F<sub>2</sub> plants for gene mapping.  
146 Nanjing35 was used as the wild-type plants for phenotypic analysis. All plants were  
147 cultivated in an experimental field under natural long-day conditions in Nanjing,  
148 China.

149

### 150 *Fertility evaluation of pollen and embryo sac*

151 Ten individuals from wild-type and *kkx* were examined to determine the pollen  
152 fertility. Ten florets from three panicles of each plant were collected 2-3 hours before  
153 flowering. All anthers per floret was mixed, placed on the slide, mashed, and stained  
154 with 1% iodine potassium iodide (I<sub>2</sub>-KI) solution, and observed with an ECLIPS E80i  
155 (Nikon, Tokyo, Japan) light microscope.

156 To observe the embryo sac development of the wild-type and *kkx*, spikelets were  
157 collected immediately after pollens disperse, fixed in FAA solution. Before staining,  
158 remove lemma, palea and anthers. The embryo sac was then processed through an  
159 ethanol series (70%, 50% and 30%) and finally transferred into distilled water (30 min  
160 each). The whole ovary was incubated in 2% aluminum potassium sulfate (KAl  
161 (SO<sub>4</sub>)<sub>2</sub>) water solution for 30 min, then held in eosin Y water solution for 10-12 h, and  
162 then in 2% aluminum potassium sulfate for 20 min, after washing 2-3 times with  
163 distilled water. The ovaries were processed through an ethanol series (30%, 50%, 70%,  
164 80%, 90%, 100% and 100%, 30 min each), then transitted to a mixture of absolute  
165 ethyl alcohol and methyl salicylate (1:1) for 1-2 h, the held in methyl salicylate over  
166 12 h. Fertility of embryo sacs was examined by confocal laser scanning microscopy  
167 (Leica SP8).

168

169 *Microscopy observations*

170 For paraffin sectioning, *kkx* and wild-type flowers from young panicles were fixed in  
171 formalin–acetic acid–alcohol (FAA) solution, and samples were treated by a graded  
172 series of dehydration and infiltration steps. Fixed tissues were embedded in paraplast.  
173 Samples were sectioned to 15  $\mu\text{m}$ , stained with 0.1% toluidine blue and observed with  
174 an ECLIPS E80i (Nikon, Tokyo, Japan) light microscope.

175 For scanning electron microscopy (SEM), young panicles were fixed in 2.5% (v/v)  
176 glutaraldehyde, and fixed overnight at 4°C after vacuuming, and dehydrated through a  
177 graded concentration of ethanol. The samples infiltrated and embedded in butyl  
178 methyl methacrylate, treated with critical point drying, and then sputter coated with  
179 platinum. All tissues were observed with HITACHI S-3000N scanning electron  
180 microscope.

181

182 *Gene mapping and RNAi suppression of the KKK gene*

183 83 plants with *kkx* phenotypic were selected from the F<sub>2</sub> mapping population of *kkx*  
184 and 93-11 for preliminary mapping using 122 polymorphic SSR (simple sequence  
185 repeat) markers between *kkx* and 93-11. Then, 513 F<sub>2</sub> recessive plants were used for  
186 fine mapping. Fine-mapping sequence-tagged site primers were designed according to  
187 the different DNA sequences of 93-11 and Nipponbare (*O. sativa*, *japonica*.) obtained  
188 from the National Center for Biotechnology Information (NCBI). Primers used for  
189 mapping are listed in Supplementary Table S1.

190 To obtain *KKX* RNAi plants, the construct LH-1390-RNAi was used as an RNAi  
191 vector. Both sense and antisense versions of a specific 200 bp fragment from the  
192 cDNA of *KKX* were amplified with primer pairs *KKX*-RNAi-L and *KKX*-RNAi-R  
193 (Supplementary Table S2), and cloned into LH-1390-RNAi to create the  
194 *dsRNAiOsKKX* construct, which was then transformed into the rice variety Nanjing35  
195 by the *Agrobacterium*-mediated method (Hiei *et al.*, 1994).

196

197 *Real-time PCR analysis*

198 Total RNA from seedling, root, shoot, leaf, panicle, young spikelet, and different stage

199 of panicles were isolated using the RNA prep Pure Plant Kit (TIANGEN, Beijing,  
200 China). First-strand cDNA was reverse transcribed from 1µg of total RNA using the  
201 PrimeScript 1st Strand cDNA Synthesis Kit (TaKaRa). Rice ubiquitin (UBQ) was  
202 used as endogenous control. Real-time PCR was performed using a SYBR Premix Ex  
203 Taq™ kit (TaKaRa) on an ABI prism 7500 real-time PCR System and three  
204 biological repeats. Primers used for real-time PCR analysis are listed in  
205 Supplementary Table S3.

206

### 207 *Subcellular localization of LUGL*

208 To explore the subcellular localization of OsLUGL, the C-terminus of OsLUGL  
209 cDNA was fused with green fluorescent protein (GFP) and inserted in the pAN580  
210 vector between the d35S promoter and the nopaline synthase (NOS) terminator. In  
211 addition, we used the mCherry-tagged rice prolamin box binding facto  
212 (RPBF-mCherry) vector as a nuclear marker (Kawakatsu *et al.*, 2009). And the  
213 35s-OsLUGL-GFP plasmid and the nuclear marker plasmid were co-transformed into  
214 rice protoplasts. Rice protoplasts were prepared, transfected, and cultured as  
215 previously described (Wang *et al.*, 2016). Fluorescence images were observed using a  
216 Zeiss LSM510. Primers used to make subcellular localization constructs are listed in  
217 Supplementary Table S2.

218

### 219 *RNA in situ hybridization*

220 RNA in situ hybridization was performed as described previously (Chen *et al.*,  
221 2015) with minor modifications. The young panicles of all stages from Nipponbare (*O.*  
222 *sativa*, *japonica*.) was fixed in FAA solution, subjected to a dehydration series and  
223 infiltration, and embedded in paraplast and sectioned at 8µm using a Leica RM2235  
224 microtome. A 360 bp gene-specific region of OsLUGL amplified with primers  
225 OsLUGL-PF and OsLUGL-PR (see Supplementary Table S2) was cloned into the  
226 pGEM-T Easy vector (Promega). The linearized templates were amplified from the  
227 pGEM-T plasmid containing the gene-specific region of SLG using primers Yt7 and  
228 Ysp6. Digoxigenin-labeled RNA probes were prepared using a DIG Northern starter



229 kit (Cat. No. 2039672, Roche) following the manufacturer's instructions. Slides were  
230 observed under bright field using a Leica DM5000B microscope.

231

### 232 *Yeast two-hybrid assay*

233 The yeast two-hybrid assays were performed using the Matchmaker Yeast  
234 Two-Hybrid System (Clontech). Various fragments from OsLUGL<sup>WT</sup> and OsLUGL<sup>kkx</sup>  
235 were cloned into pGBKT7, and OsSEU was cloned into pGADT7. All constructs were  
236 transformed into the recipient strain AH109 and selected on SD/-Trp-Leu (DDO)  
237 plates at 30°C for 2-3 days. The interactions were assayed on selective medium  
238 SD/-Trp-Leu-His-Ade (QDO) plates at 30°C for 3-5 days. For testing the interaction  
239 with OsMADSs, full-length cDNA of OsMADS8/14/15/18 were cloned into pGBKT7,  
240 and full-length cDNA of OsMADS6/14/15/18 were cloned into pGADT7. All  
241 constructs and/or OsSEU-AD were transformed into the recipient strain AH109 and  
242 selected as mentioned above. Primers used to make these construct are listed in  
243 Supplementary Table S2.

244

### 245 *Bimolecular fluorescence complementation (BiFC) assay*

246 Full-length cDNA of OsLUGL<sup>WT</sup> and OsLUGL<sup>kkx</sup> were cloned into the p2YN (eYFP)  
247 vector to construct the OsLUGL<sup>WT</sup>-eYFPN fusion protein and OsLUGL<sup>kkx</sup>-eYFPN  
248 fusion protein, respectively. OsSEU was cloned into the p2YC (eYFP) vector to  
249 produce OsSEU-eYFPC fusion proteins. Primers used to make these constructs are  
250 listed in Supplementary Table S2. These plasmids were co-expressed in tobacco leaf  
251 epidermis cells by *Agrobacterium*-mediated infiltration (Hiei *et al.*, 1994). The  
252 mCherry ER-rk CD3-959 was used as ER (endoplasmic reticulum) marker (Nelson *et*  
253 *al.*, 2007). Yellow fluorescent protein was observed using a Zeiss LSM510 after 48 h  
254 infiltration.

255

### 256 *Transactivation analysis*

257 The full-length OsSEU was fused to the GAL4 DNA BD-coding (Yeast Two-hybrid  
258 System, Clontech) sequence and constructed into pAN580, which was cutoff GFP

259 protein, to generate effector plasmid pAN580-GAL4-OsSEU. The full-length  
260 OsLUGL<sup>WT</sup> was fused into the pAN580 (no GFP) to generate effector plasmids  
261 pAN580- OsLUGL<sup>WT</sup>. The reporter was a plasmid harbouring firefly LUC (luciferase)  
262 gene which was controlled by a modified 35S promoter with 5× the UAS (upstream  
263 activating sequence) in it. pRT107 vector containing the BD sequence and BD-VP16  
264 fusion sequence were used as negative and positive control respectively. A pPTRL  
265 plasmid that contained a CaMV (Cauliflower mosaic virus) 35S promoter and Renilla  
266 LUC, was used as an internal control (Ohta *et al.*, 2000). To test the transactivation of  
267 OsMADSs, full-length cDNA of OsMADS8/18 were fused into pAN580 (no GFP) to  
268 generate effector. To generate the pOsGH3-8:LUC reporter construct, ~ 2 kb of the  
269 OsGH3-8 promoter was cloned into pGreenII-0800-LUC. The different effectors and  
270 different reporters were co-transformed into rice protoplasts in different combinations.  
271 Rice protoplasts were prepared as mentioned before. The luciferase activity assay was  
272 investigated using the dual luciferase reporter assay system and the relative luciferase  
273 activity was detected referring to the protocol (Promega, E1910). The primers used  
274 for the constructions are listed in Table S2.

275

#### 276 *Yeast one- hybrid assay*

277 For yeast one-hybrid assays, the full length cDNA of OsMADS8/18 were cloned into  
278 pB42AD vector, and promoter of OsGH3-8 was fused into pLacZi vector. Plasmids  
279 were co-transformed into yeast strain EGY48 according to the manufacturer's manual  
280 (Clontech). Transformed yeast was plated onto a synthetic medium DDO (-Ura/-Trp).  
281 Positive transformants was screened by adding 80 mg·L<sup>-1</sup> X-α-gal into SD/-Ura/-Trp  
282 medium. The primers used for the constructions are listed in Table S2.

283

## 284 **Results**

### 285 *Phenotypic characterization of *kkx**

286 To investigate the regulation of rice floral development, we identified floral mutant  
287 *kkx*, which has displays open hulls, semi-sterile, smaller anthers and pistils, and poor  
288 quality seeds (Figure 1a-e). I<sub>2</sub>-KI staining showed normal pollen fertility (Figure 1f,  
289 g). Also, observation of the embryo sacs showed that normal embryo sacs in wild-type  
290 and *kkx*, of which two polar nuclei located in the central cavity with horizontal  
291 arrangement instead of vertical one (Figure S1). In terms of agronomic traits  
292 1,000-grain weight was significantly reduced, and seed set was  $57.50 \pm 6.40\%$   
293 compared to wild-type at  $82.78 \pm 6.63\%$ . Plant height and panicle length were similar  
294 to wild-type (Figure S1).

295

### 296 *The *kkx* mutant shows open glumes*

297 The lemma and palea of wild-type florets form an interlocked structure with two  
298 hamuli at the marginal regions of the palea (mrp) (Figure 1b and Figure 2a-c). In *kkx*,  
299 the abnormally shaped palea cannot interlock with the lemma because of lacking or  
300 incomplete hamulus in mrp (Figure 1b and Figure 2d-f). Both wild-type and *kkx* have  
301 five vascular bundles in the lemma and three in palea (Figure 2a and d).

302 We analyzed the early spikelets of wild-type and *kkx* using scanning electron  
303 microscopy (SEM). At late stage Sp6 (the stamen primordial formation stage), palea  
304 primordia were already formed and the stamen primordia were initiated both in  
305 wild-type and *kkx* (Figure 2g and k). At early stage Sp7 and stage Sp7 (pistil  
306 primordium formation stage), the pistil primordium formed in the center of the six  
307 stamens. The developmental processes of stamen were not significantly different  
308 between wild-type and *kkx*, but there was a bulge on palea of *kkx*, which marked with  
309 white square (Figure 2h, i, l and m). At stage Sp8 (the ovule and pollen formation  
310 stage), wild-type and *kkx* formed a normal spikelet, whereas *kkx* had a larger spacing  
311 between the lemma and palea (Figure 2j and n). SEM analysis revealed that both the  
312 inner and outer epidermal cells of lemma and palea in *kkx* were similar to those of

313 wild-type (Figure S3).

314

315 *OsKXX encodes a putative LEUNIG-Like (LUGL) transcriptional co-repressors*

316 An F<sub>2</sub> population from a cross of the *kkx* mutant and wild-type segregated 151  
317 individuals with wild-type phenotype and 38 individuals with mutant phenotype, the  
318 segregation ratio was consistent with that expected a single locus ( $\chi^2_{3:1} = 0.418$ ,  
319  $P_{1df} > 0.05$ ). We selected 83 individuals with *kkx* phenotype from the F<sub>2</sub> progeny of a  
320 cross between *kkx* and 93-11 and mapped the locus in a region between InDel marker  
321 InDelB and SSR marker RM5496 on the long arm of chromosome 1. Further fine  
322 mapping narrowed this region to a 36.8 kb genomic region (Figure 3a and b).  
323 According to the Rice Genome Automated Annotation System (RiceGAAS,  
324 <http://ricegaas.dna.affrc.go.jp>) there were three putative genes in this region, coding  
325 for one pentatricopeptide protein, and two *LEUNIG-like (LUGL)* transcriptional  
326 co-repressors (Figure 3c).

327 We chose the two *LEUNIG* genes, *LOC\_Os01g042260* and *LOC\_Os01g042270* as  
328 potential candidates. Gene expression profiles analyzed on the Rice Expression  
329 Profile Database (RiceXPro, <http://ricexpro.dna.affrc.go.jp/>) indicated that  
330 *LOC\_Os01g042270* was barely expressed in young inflorescences, and we also could  
331 not obtain a PCR product from cDNA extracted from young inflorescences (20 mm)  
332 (Figure S4). *LOC\_Os01g042260* was chosen for further analysis, which encoding a  
333 95.8 kD protein with 876 amino acids, containing three parts, an N-terminal LUF5  
334 domain, a central Q-rich domain, and a C-terminal with 7 WD40 repeats (Figure 3d).  
335 Sequencing results revealed that the gene in *kkx* had a T deleted in the fifth WD40  
336 repeat, resulting in an S779 to L779 transition and a premature stop codon (Figure 3d,  
337 and Figure S5).

338 To confirm that the deletion in *LOC\_Os01g042260* was responsible for the  
339 uncharacteristic open floret phenotype of the *kkx* mutant, we generated transgenic  
340 plants carrying a *LOC\_Os01g042260* RNA interference (*RNAi*) construct. A plasmid  
341 containing two 200 bp fragments of wild-type *LOC\_Os01g042260* cDNA inserted  
342 forward and reverse into an *LH-1390-RNAi* vector was introduced into rice cv.

343 Nanjing 35. Compared to wild-type, positive lines *RNAi-4* and *RNAi-6* showed open  
344 florets and had significantly reduced transcripts of *LOC\_Os01g042260* (Figure 3e-g).  
345 Anatomical observations revealed that lemmas and paleas of *RNAi-4* and *RNAi-6*  
346 were unlocked (Figure 4e, h-k). These results confirmed that *LOC\_Os01g042260*  
347 (*OsLUGL*) was the *KKX* gene.

348

349 *OsLUGL* was localized in the nucleus and strongly expressed in young panicles

350 To determine the subcellular localization of *OsLUGL*, we fused *OsLUGL* with green  
351 fluorescent protein (GFP) at its C-terminus. Transient expression of this fusion protein  
352 in rice protoplasts revealed GFP signals in the nucleus (Figure 4a). RT-PCR analysis  
353 showed that *OsLUGL* was expressed in all tissues, and strongly in young panicles.  
354 Furthermore, *OsLUGL* was most highly expressed during early panicle development,  
355 but expression dropped dramatically once the spikelets reached 0.5 cm (Figure 4b).  
356 We also performed in-situ hybridization to localize *OsLUGL* expression during early  
357 panicle development. Strong expression was detected in spikelet meristem primordia,  
358 floral meristem primordia, lemma and palea primordia, and vascular regions (Figure  
359 4c). The results of both RT-PCR analysis and in-situ hybridization implied a role of  
360 *OsLUGL* in floral organ development.

361

362 *OsLUGL* interacts with *OsSEU* and is required by *OsSEU* to regulate transcription in  
363 *planta*

364 Phylogenetic and protein structure analysis found that *OsLUGL* had high homology,  
365 especially the LUFS domain in 15 plants (Figure S6 and S7), and in *Arabidopsis*, the  
366 protein At4g32551 was reported that it needs an adaptor protein SEU to form a  
367 complex to function as a transcriptional regulator (Sridhar *et al.*, 2004). To investigate  
368 the functional forms of *OsLUGL*, the full-length and different truncated *OsLUGL*  
369 proteins were used for interaction analysis. As shown in Figure 5a, the LUFS domain  
370 in the N-terminus of *OsLUGL* was required for interacting with *OsSEU* both in  
371 wild-type and *kkx*, but Q-rich domain and WD40 repeats were not affect their  
372 interaction. And the ability of this interaction was no significantly different between

373 the wild-type and the *kkx* mutant (Figure 5b). In addition, BiFC analysis also showed  
374 that OsLUGL physically interacted with OsSEU in nucleus (Figure 5c).

375 We next tested whether OsLUGL functioned as a transcription regulator in rice. A  
376 transient rice protoplast repression assay was adopted, which 5×UAS GAL4-LUC as  
377 reporter. OsSEU was fused to the GAL4 DNA BD-coding sequence and transferred  
378 into pAN580 to generate effectors pAN580-SEU (35S::SEU-BD) and using  
379 pAN580-GAL4 (35S::GAL4-BD) as a negative control. OsLUGL<sup>WT</sup> was fused to  
380 pAN580 to generate effectors pAN580- LUGL<sup>WT</sup> (Figure 5d). Rice leaf sheath  
381 protoplasts were separately transfected with each plasmid together with the reporter,  
382 and LUC expression were quantified. SEU-BD or GAL4-BD alone showed no effect  
383 on LUC expression, whereas LUGL<sup>WT</sup> with SEU-BD significantly reduced LUC  
384 expression (Figure 5e). These results confirmed that OsLUGL together with OsSEU  
385 functions as a transcriptional regulator in rice.

386

#### 387 *OsSEU interacts with SEP3 and AP1 in rice*

388 In *Arabidopsis*, neither LUG nor SEU possesses a recognizable DNA binding motif,  
389 the LUG-SEU complex need DNA-binding factor APETALA1 (AP1) and  
390 SEPALLATA3 (SEP3) to mediate transcriptional during flower development. During  
391 this process, AP1 and SEP3 need to interact with SEU (Sridhar *et al.*, 2006; Sitaraman  
392 *et al.*, 2008). Then, we tested whether AP1 and SEP3 serve as the DNA-binding  
393 partners of OsLUGL-OsSEU in rice. To determine AP1 or SEP3 that interacts with  
394 OsSEU, we performed a yeast two-hybrid assay. OsMADS14, OsMADS15 and  
395 OsMADS18 are orthologs of *Arabidopsis* AP1, and OsMADS8 is an ortholog of  
396 SEP3 in *Arabidopsis*. OsSEU interacted strongly with OsMADS8 and OsMADS18,  
397 but failed to interact with OsMADS14 or OsMADS15 (Figure 5f). These results  
398 indicated that OsSEU interact with SEP3 and AP1 in rice.

399

#### 400 *Altered expression of floral organ identity genes in *kkx**

401 To further understand the function of OsLUGL, we tested the expression of  
402 A/B/C/D/E class genes. In real-time PCR analysis, A-class (*OsMADS14/18*), B-class

403 (*OsMADS2* and *OsMADS16*), C-class (*OsMADS3/58*) were down-regulated in *kcx*  
404 inflorescences (15 mm); A-class (*OsMADS15*) was up-regulated; E-class  
405 (*OsMADS7/8/34/57*) genes were down-regulated; E-class (*OsMADS22/29* and  
406 *OsCFO1*) were up-regulated. C-class (*OsDL*) gene, D-class (*OsMADS13*) gene and  
407 E-class (*OsMADS16*) genes did not vary (Figure 6). *REPI* is a *CYCLOIDEA*-like  
408 gene, *osrep1* shows defects in the palea, but not in lemma (Yuan *et al.*, 2009). In *kcx*,  
409 the expression of *OsREPI* was down-regulated (Figure 6a). These results showed that  
410 the OsLUGL could regulate the expression of floral organ identity genes in rice.

411

412 *OsLUGL-OsSEU-OsAPI-OsSEP3* complex has regulatory effects on *OsGH3-8*  
413 expression, auxin level and auxin signaling pathways

414 The phytohormone auxin plays a central role in almost all developmental processes, it  
415 regulates axillary meristem initiation (Zhao, 2010; Habets and Offringa, 2014).  
416 *OsGH3-8* (*OsMGH3*) is an auxin negative component in regulating auxin level and  
417 activity, *dsRNAiOsMGH3* caused phenotypes consistent with auxin overproduction or  
418 activated signaling, such as ectopic rooting from aerial nodes, carpel development,  
419 glume form, pollen viability and reduced fertility (Yadav *et al.*, 2011), which similar  
420 to the *kcx* mutant. Also, *OsMADS6* is positive regulator for *OsGH3-8* (Prasad *et al.*,  
421 2005; Zhang *et al.*, 2010; Yadav *et al.*, 2011) (Figure 7a and b). In *kcx*, the expression  
422 of *OsGH3-8* was down-regulated, but no change in *OsMADS6*, so, a question arises  
423 here. What causes the down-regulated of *OsGH3-8*? In *Arabidopsis*, neither OsLUGL  
424 nor OsSEU regulate genes expression directly, because the absent of DNA-binding  
425 domain. The LUG-SEU complex needs AP1 and SEP3 act as bridge to binding DNA  
426 downstream. In this study, we confirmed that OsSEU can interact with OsMADS8  
427 (SEP3) and OsMADS18 (AP1) (Figure 5f), and OsMADS8 and OsMADS18 have  
428 high homogeneous of OsMADS6, so we suspect that *OsGH3-8* is direct target of  
429 OsMADS8 and/or OsMADS18, OsLUGL-OsSEU-OsAPI-OsSEP3 complex could  
430 regulating *OsGH3-8* directly. To test this hypothesis, we performed yeast one hybrid  
431 assays using in vitro-expressed OsMADA8 and OsMADS18. As shown in Figure 7a,  
432 both of OsMADS8 and OsMADS18 bound to the *OsGH3-8* promoter. To examine the



433 regulation of OsMADS8/18 on the expression of *OsGH3-8*, as shown in Figure 7b,  
434 we performed transient expression assays using ~ 2 kb of the *OsGH3-8* promoter  
435 fused with LUC as a reporter, and OsMADS8/18 were expressed under control of 35S  
436 promoter as effectors. Various effectors and reporter were transfected together into rice  
437 protoplasts in different combinations (Figure 7c). Higher LUC activity was detected  
438 when OsMADS8/18 protein was transfected with the reporter construct compared  
439 with the internal control. Meanwhile, we found that the LUC activity is higher in  
440 which when two effectors (OsMADS8 and OsMADS18) co-transfected with  
441 pOsMGH3-8 than that when single effector (OsMADS8 or OsMADS18)  
442 co-transfected with pOsMGH3-8. These findings strongly support the hypothesis that  
443 OsMADS8 and OsMADS18 regulate *OsGH3-8* by binding the promoter of *OsGH3-8*,  
444 and OsMADS8 and OsMADS18 have a superposition effect on regulation.  
445 The phenotypes of *dsRNAiOsMGH3* are similar to *OsYUCCA* overexpression  
446 transgenic rice. *OsYUCCA* is a rice auxin biosynthetic gene, and the overproduction  
447 of auxin in its overexpression transgenic lines is expected (Yamamoto *et al.*, 2007). In  
448 *kxx*, we found the expression of *OsYUCCA1* is up-regulated, and raised auxin level  
449 (Figure 7d and e). We also analyzed the expression of all *OsARFs* in young  
450 inflorescences (15 mm). The results show that expressions of almost all *OsARFs* were  
451 reduced in *kxx*, except *OsARF8*, *OsARF10*, *OsARF15*, and *OsARF20* (Figure S9a-d),  
452 which suggested that OsLUGL affected floral organ formation and development by  
453 regulating the auxin level and signaling pathway.

454



## 455 **Discussion**

456 Rice is model plant for functional genomics studies in crop plants, its spikelet  
457 morphogenesis is important to the achievement of yield. In this study, we identified a  
458 mutant *kkx* with unlocked hull phenotype, reduced fertility and bugle in Sp7 palea  
459 (Figure 1b and 2m), which indicated that the function of *KKX* in spikelet development.  
460 We confirmed that the *KKX* encoded a LUG-like transcriptional regulator. LUG, a  
461 member of the Groucho family in *Arabidopsis*, acts as a transcriptional co-repressor  
462 to regulate plant development and hormonal signaling (Liu and Meyerowitz, 1995;  
463 Conner and Liu, 2000; Sitaraman *et al.*, 2008; Grigorova *et al.*, 2011). LUG to require  
464 adaptor protein SEU to form a LUG-SEU complex in order to regulating gene  
465 expression (Sridhar *et al.*, 2004). Neither LUG nor SEU possesses a recognizable  
466 DNA binding motif, they need AP1 and SEP3 to act as the DNA-binding partners  
467 (Gregis *et al.*, 2006; Sridhar *et al.*, 2006; Gregis *et al.*, 2009). Our study demonstrated  
468 that OsLUGL also needs to interact with OsSEU to form a complex that acts as a  
469 transcriptional regulator (Figure 5a-e), and OsSEU could interacted with SEP3  
470 (OsMADS8) and AP1 (OsMADS18) (Figure 5f) to form  
471 OsLUGL-OsSEU-OsAP1-OsSEP3 complex in rice.

472 Expression analysis of some floral organ-related genes in wild-type and *kkx* showed  
473 that *OsLUGL* acted as a positive regulator of almost all A/B/C/D/E genes. In  
474 *Arabidopsis*, there is a ABCDE model of floral organ specification, A-class genes  
475 specify the identity of sepals in whorl 1; A- and B-class genes function together  
476 determine the identity of petals in whorl 2; B- and C-class genes coordinated define  
477 stamen identity in whorl 3; and C- and D-class genes act to specify carpels in whorl 4.  
478 E-class genes are co-regulator with A-, B-, C- and D-class genes during floral identity  
479 in all whorls (Coen and Meyerowitz, 1991; Alvarez-Buylla *et al.*, 2010; Litt and  
480 Kramer, 2010). Previous research has shown that A-class genes and C-class genes  
481 function antagonize each other, and LUG represses the expression of *AG* genes  
482 (C-class) (Ma and dePamphilis, 2000). There is a similar ABCDE model in rice  
483 (Ferrario *et al.*, 2004; Bommert *et al.*, 2005; Thompson and Hake, 2009; Ciaffi *et al.*,

484 2011; Tanaka *et al.*, 2013; Zhang and Yuan, 2014; Wang *et al.*, 2015; Dreni and Zhang,  
485 2016). But, in this study, in *kxx*, A-class genes and C-class genes are all  
486 down-regulated. We also test their expression in 5 mm young inflorescences, the  
487 expression of A-class and C-class genes still down-regulated (Figure S10). These  
488 results indicated that OsLUGL-OsSEU might have different role in regulating  
489 A/B/C/D gene expression in rice, or there are another unknown factors involved in  
490 this regulated process.

491 Previous reports considered that normal development of *mrp* may require *OsMADS1*  
492 and *OsMADS6* (Khanday *et al.*, 2013; Tao *et al.*, 2018). Mutation of *OsMADS1*  
493 resulted in uncharacteristic flowers and/or loss of flower determinacy, suggesting a  
494 role of *OsMADS1* in specifying determinacy of the flower meristem, and effects on  
495 development of all floral organs (Hu *et al.*, 2015). An *osmads6* mutant showed defects  
496 in palea identity; the palea was half open and likely caused by lack of interlocking  
497 between lemma and palea (Ohmori *et al.*, 2009; Li *et al.*, 2010; Tao *et al.*, 2018).  
498 Similarly, in *kxx*, the glume was half opened (Figure 1b). Compared with *osmads1*  
499 and *osmads6*, the phenotypes of *kxx* were weaker than *osmads1* and similar to  
500 *osmads6*. Confusingly, the expression of *OsMADS1* and *OsMADS6* were no  
501 significant different between wild-type and *kxx* (Figure 6a-c). So, we suspect there  
502 might be another factors or pathway to regulating the floral development in rice.  
503 *OsGH3-8* is a downstream target of *OsMADS6* and an auxin negative component in  
504 regulating auxin level and activity, and *dsRNAiOsMGH3* line shows the similar  
505 phenotype as *kxx* (Yadav *et al.*, 2011). In this study, we confirmed that *OsMADS8* and  
506 *OsMADS18* can act as a positive regulator of *OsGH3-8* (Figure 7). Also, the  
507 expression of *OsMADS8*, *OsMADS18* and *OsGH3-8* were repressed in *kxx* (Figure 6  
508 and 7d). There are 12 members of *GH* in rice, we test the other *OsGH* in *kxx*, most of  
509 them were down-regulated except *OsGH3-12* and *OsGH3-13*, but the expression of  
510 *OsGH3-12* and *OsGH3-13* were very low (Figure S11). The repressed transcriptional  
511 of *OsGH* indicate that *OsMADS8* and/or *OsMADS18*, or the other *OsMADS*-box  
512 genes could regulate *OsGH* expression directly, which need to be further studied. All  
513 these results show that OsLUGL-OsSEU-OsAP1-OsSEP3 could regulate the *OsGH*

514 transcriptional directly. But, in this study, the reasons for the altered expression of  
515 OsMADS8 and OsMADS8 are still unknown. Besides, the level of auxin in *kkx* was  
516 increased, which indicate that OsLUGL affect the auxin level, and OsLUGL regulate  
517 floral development by auxin relative pathway.

518 Morphogen-like properties in developmental processes, such as meristem  
519 specification and lateral organ formation, are often attributed to auxin. These  
520 processes are mediated by Aux/IAA induced protein degradation and subsequent  
521 *auxin response factor (ARF)* activation (Guilfoyle and Hagen, 2007; Zhang and Yuan,  
522 2014; Weijers and Wagner, 2016). Many *ARFs* in *Arabidopsis*, such as *arf1*, *arf2*, and  
523 *arf3* are reported to affect floral organs (Ellis *et al.*, 2005; Nishimura *et al.*, 2005;  
524 Zheng *et al.*, 2018). We described rice mutant, *osarf19*, in which florets displayed  
525 three types of abnormalities. The first was an additional lemma-like organ on the  
526 same side as the palea, the second was an enlarged palea with a curved tip, which  
527 generated an unclosed floret, and the third was a variably degenerated palea (Zhang *et*  
528 *al.*, 2015). In the present study, we assayed expression of *OsARFs* and most of them  
529 were down-regulated in *kkx* (Figure S9). This result provides the evidence that the  
530 auxin-dependent gene expression relies on the inhibiting role of auxin, as inhibitors of  
531 the *ARFs*. So we confirm that OsLUGL regulate floral development by regulate the  
532 *OsARFs* expression.

533 In previous study, OsMADS6 interact with OsMADS13, and redundantly regulate  
534 carpel/ovule identity and floral determinacy (Li *et al.*, 2011). OsMADS6 was also  
535 shown to physically interact with OsMADS4 during early flower development (Seok  
536 *et al.*, 2010). Also, in rice flower development, OsMADS1 interact with OsMADS6,  
537 and B-, C- and D-class proteins (Hu *et al.*, 2015). So, we suspect that AP1 protein  
538 interact with SEP3 protein. We test the interaction of OsMADS8 (SEP3 gene),  
539 OsMADS14, OSMADS15 and OsMADS18 (AP1 genes). Yeast two-hybrid assays  
540 demonstrated that OsMADS8 physically interacts with OsMADS14, OsMADS15 and  
541 OsMADS18, respectively. Also, OsMADS14, OsMADs15 and OsMADS18 could  
542 interact with each other in yeast (Figure S12). This result indicated that SEP3 and  
543 AP1 could co-regulate the expression of OsGH3-8 by form a complex. And it

544 provides the evidence that the OsMADS8 and OSMADS18 have a superposition  
545 effect on regulating *OsGH3-8* (Figure 7c).

546 Collectively, our findings show that OsLUGL acts like a transcriptional regulator in  
547 regulating the expression of A-, B-, C-, D-, and E-class genes;  
548 OsLUGL-OsSEU-OsAP1-OsSEP3 complex could participate in regulation of flower  
549 development by regulation *OsGH* expression directly, and indirectly regulating the  
550 auxin level and *OsARFs* expression. SEP3 and AP1 worked together to act as  
551 co-regulator in regulate *OsGH3-8* expression. However, there are still unanswered  
552 questions. We have no direct evidence to explain the regulate relationship between  
553 OsLUGL-OsSEU and *OsMADS8/18*. Why there is no transcription repress in this  
554 work? We still have no evidence to explain this issue.

555 Normal floral structure is necessary for seed production and quality. An abnormal  
556 floret, even a half-opened hull, with normal pollen fertility causes a significant  
557 reduction in seed setting because the opened glume cannot prevent rain or dew from  
558 entering the floret during the fertilization and early grain-filling stages. Also, an  
559 abnormal floret will not provide an optimum space for seed development, thus  
560 causing smaller, malformed seeds with poor color and quality. Hence, investigation of  
561 the regulatory mechanisms underlying floral development is necessary for rice  
562 breeding and production.

563

## 564 **Supplementary data**

565 Figure S1. Observation of embryo sac development.

566 Figure S2. Agronomic traits contrast between wild-type and *ktx*.

567 Figure S3. Scanning electron micrographs (SEM) analysis epidermis cells of lemma  
568 and palea in wild-type and *ktx*.

569 Figure S4. Gene expression profile of *LOC\_Os01g042270*.

570 Figure S5. Alignment of nucleic acid sequence and protein sequence of  
571 *LOC\_Os01g042260*.

572 Figure S6. Phylogenetic analysis of the LUGL family in 15 plants.

573 Figure S7. The amino acid homology sequence analysis of KKKX.

574 Figure S8. The amino acid homology sequence analysis of OsMADS6, OsMADS8  
575 and OsMADS18.

576 Figure S9. Expression levels of rice *ARF* family genes in wild-type and *kkx* young  
577 inflorescences (15 mm).

578 Figure S10. Expression levels of floral organ development genes in young  
579 inflorescences (5 mm) of wild-type and *kkx*, respectively.

580 Figure S11. Expression levels of rice *GH* family genes in wild-type and *kkx* young  
581 inflorescences (15 mm).

582 Figure S12. Analysis of the interaction between OsMADSs genes using yeast  
583 two-hybrid assays.

584 Table S1. Primers used in mapping.

585 Table S2. Primers used for vector construction in this study.

586 Table S3. Primers used for real-time PCR analysis.

587

## 588 **Acknowledgments**

589 We thank the Key Laboratory of Biology, Genetics and Breeding of Japonica Rice in  
590 the Mid-lower Yangtze River, Ministry of Agriculture, P.R. China, and Jiangsu  
591 Collaborative Innovation Center for Modern Crop Production for support. This  
592 research was supported by the National Key Research and Development Program of  
593 China (2017YFD0100401), National Key Transform Program (2016ZX08001004)  
594 and Jiangsu Science and Technology Development Program (BE2018388).

595

## 596 **References**

- 597 **Alvarez-Buylla ER, Azpeitia E, Barrio R, Benitez M, Padilla-Longoria P.** 2010. From ABC genes to  
598 regulatory networks, epigenetic landscapes and flower morphogenesis: making biological sense of  
599 theoretical approaches. *Semin Cell Dev Biol* **21**, 108-117.
- 600 **Arora R, Agarwal P, Ray S, Singh AK, Singh VP, Tyagi AK, Kapoor S.** 2007. MADS-box gene family in rice:  
601 genome-wide identification, organization and expression profiling during reproductive development  
602 and stress. *BMC Genomics* **8**, 242.
- 603 **Attia KA, Abdelkhalik AF, Ammar MH, Wei C, Yang J, Lightfoot DA, El-Sayed WM, El-Shemy HA.** 2009.  
604 Antisense phenotypes reveal a functional expression of OsARF1, an auxin response factor, in

- 605 transgenic rice. *Curr Issues Mol Biol* **11 Suppl 1**, i29-34.
- 606 **Boer DR, Freire-Rios A, van den Berg WA, Saaki T, Manfield IW, Kepinski S, Lopez-Vidriero I,**  
607 **Franco-Zorrilla JM, de Vries SC, Solano R, Weijers D, Coll M.** 2014. Structural basis for DNA binding  
608 specificity by the auxin-dependent ARF transcription factors. *Cell* **156**, 577-589.
- 609 **Bommert P, Satoh-Nagasawa N, Jackson D, Hirano HY.** 2005. Genetics and evolution of inflorescence  
610 and flower development in grasses. *Plant Cell Physiol* **46**, 69-78.
- 611 **Callens C, Tucker MR, Zhang D, Wilson ZA.** 2018. Dissecting the role of MADS-box genes in monocot  
612 floral development and diversity. *J Exp Bot* **69**, 2435-2459.
- 613 **Chen J, Gao H, Zheng XM, Jin M, Weng JF, Ma J, Ren Y, Zhou K, Wang Q, Wang J, Wang JL, Zhang X,**  
614 **Cheng Z, Wu C, Wang H, Wan JM.** 2015. An evolutionarily conserved gene, FUWA, plays a role in  
615 determining panicle architecture, grain shape and grain weight in rice. *Plant J* **83**, 427-438.
- 616 **Ciaffi M, Paolacci AR, Tanzarella OA, Porceddu E.** 2011. Molecular aspects of flower development in  
617 grasses. *Sex Plant Reprod* **24**, 247-282.
- 618 **Coen ES, Meyerowitz EM.** 1991. The war of the whorls: genetic interactions controlling flower  
619 development. *Nature* **353**, 31-37.
- 620 **Conner J, Liu Z.** 2000. LEUNIG, a putative transcriptional corepressor that regulates AGAMOUS  
621 expression during flower development. *Proc Natl Acad Sci U S A* **97**, 12902-12907.
- 622 **Cui R, Han J, Zhao S, Su K, Wu F, Du X, Xu Q, Chong K, Theissen G, Meng Z.** 2010. Functional  
623 conservation and diversification of class E floral homeotic genes in rice (*Oryza sativa*). *Plant J* **61**,  
624 767-781.
- 625 **Ditta G, Pinyopich A, Robles P, Pelaz S, Yanofsky MF.** 2004. The SEP4 gene of *Arabidopsis thaliana*  
626 functions in floral organ and meristem identity. *Curr Biol* **14**, 1935-1940.
- 627 **Dreni L, Kater MM.** 2014. MADS reloaded: evolution of the AGAMOUS subfamily genes. *New Phytol*  
628 **201**, 717-732.
- 629 **Dreni L, Pilatone A, Yun D, Erreni S, Pajoro A, Caporali E, Zhang D, Kater MM.** 2011. Functional  
630 analysis of all AGAMOUS subfamily members in rice reveals their roles in reproductive organ identity  
631 determination and meristem determinacy. *Plant Cell* **23**, 2850-2863.
- 632 **Dreni L, Zhang D.** 2016. Flower development: the evolutionary history and functions of the AGL6  
633 subfamily MADS-box genes. *J Exp Bot* **67**, 1625-1638.
- 634 **Ellis CM, Nagpal P, Young JC, Hagen G, Guilfoyle TJ, Reed JW.** 2005. AUXIN RESPONSE FACTOR1 and  
635 AUXIN RESPONSE FACTOR2 regulate senescence and floral organ abscission in *Arabidopsis thaliana*.  
636 *Development* **132**, 4563-4574.
- 637 **Ferrario S, Immink RG, Angenent GC.** 2004. Conservation and diversity in flower land. *Curr Opin Plant*  
638 *Biol* **7**, 84-91.
- 639 **Fornara F, de Montaigu A, Coupland G.** 2010. SnapShot: Control of flowering in *Arabidopsis*. *Cell* **141**,  
640 550, 550 e551-552.
- 641 **Gregis V, Sessa A, Colombo L, Kater MM.** 2006. AGL24, SHORT VEGETATIVE PHASE, and APETALA1  
642 redundantly control AGAMOUS during early stages of flower development in *Arabidopsis*. *Plant Cell* **18**,  
643 1373-1382.
- 644 **Gregis V, Sessa A, Dorca-Fornell C, Kater MM.** 2009. The *Arabidopsis* floral meristem identity genes  
645 AP1, AGL24 and SVP directly repress class B and C floral homeotic genes. *Plant J* **60**, 626-637.
- 646 **Grigorova B, Mara C, Hollender C, Sijacic P, Chen X, Liu Z.** 2011. LEUNIG and SEUSS co-repressors  
647 regulate miR172 expression in *Arabidopsis* flowers. *Development* **138**, 2451-2456.
- 648 **Guilfoyle TJ, Hagen G.** 2007. Auxin response factors. *Curr Opin Plant Biol* **10**, 453-460.

- 649 **Habets ME, Offringa R.** 2014. PIN-driven polar auxin transport in plant developmental plasticity: a key  
650 target for environmental and endogenous signals. *New Phytol* **203**, 362-377.
- 651 **Hiei Y, Ohta S, Komari T, Kumashiro T.** 1994. Efficient transformation of rice (*Oryza sativa* L.) mediated  
652 by *Agrobacterium* and sequence analysis of the boundaries of the T-DNA. *Plant J* **6**, 271-282.
- 653 **Hu L, Liang W, Yin C, Cui X, Zong J, Wang X, Hu J, Zhang D.** 2011. Rice MADS3 regulates ROS  
654 homeostasis during late anther development. *Plant Cell* **23**, 515-533.
- 655 **Hu Y, Liang W, Yin C, Yang X, Ping B, Li A, Jia R, Chen M, Luo Z, Cai Q, Zhao X, Zhang D, Yuan Z.** 2015.  
656 Interactions of OsMADS1 with Floral Homeotic Genes in Rice Flower Development. *Mol Plant* **8**,  
657 1366-1384.
- 658 **Ikeda M, Miura K, Aya K, Kitano H, Matsuoka M.** 2013. Genes offering the potential for designing  
659 yield-related traits in rice. *Current Opinion in Plant Biology* **16**, 213-220.
- 660 **Kawakatsu T, Yamamoto MP, Touno SM, Yasuda H, Takaiwa F.** 2009. Compensation and interaction  
661 between RISBZ1 and RPBF during grain filling in rice. *Plant J* **59**, 908-920.
- 662 **Khanday I, Yadav SR, Vijayraghavan U.** 2013. Rice LHS1/OsMADS1 controls floret meristem  
663 specification by coordinated regulation of transcription factors and hormone signaling pathways. *Plant*  
664 *Physiol* **161**, 1970-1983.
- 665 **Li H, Liang W, Hu Y, Zhu L, Yin C, Xu J, Dreni L, Kater MM, Zhang D.** 2011. Rice MADS6 interacts with  
666 the floral homeotic genes SUPERWOMAN1, MADS3, MADS58, MADS13, and DROOPING LEAF in  
667 specifying floral organ identities and meristem fate. *Plant Cell* **23**, 2536-2552.
- 668 **Li H, Liang W, Jia R, Yin C, Zong J, Kong H, Zhang D.** 2010. The AGL6-like gene OsMADS6 regulates  
669 floral organ and meristem identities in rice. *Cell Res* **20**, 299-313.
- 670 **Litt A, Kramer EM.** 2010. The ABC model and the diversification of floral organ identity. *Semin Cell Dev*  
671 *Biol* **21**, 129-137.
- 672 **Liu Z, Meyerowitz EM.** 1995. LEUNIG regulates AGAMOUS expression in Arabidopsis flowers.  
673 *Development* **121**, 975-991.
- 674 **Ma H, dePamphilis C.** 2000. The ABCs of floral evolution. *Cell* **101**, 5-8.
- 675 **Malcomber ST, Kellogg EA.** 2004. Heterogeneous expression patterns and separate roles of the  
676 SEPALLATA gene LEAFY HULL STERILE1 in grasses. *Plant Cell* **16**, 1692-1706.
- 677 **Malcomber ST, Kellogg EA.** 2005. SEPALLATA gene diversification: brave new whorls. *Trends Plant Sci*  
678 **10**, 427-435.
- 679 **Nelson BK, Cai X, Nebenfuhr A.** 2007. A multicolored set of in vivo organelle markers for  
680 co-localization studies in Arabidopsis and other plants. *Plant J* **51**, 1126-1136.
- 681 **Nishimura T, Wada T, Yamamoto KT, Okada K.** 2005. The Arabidopsis STV1 protein, responsible for  
682 translation reinitiation, is required for auxin-mediated gynoecium patterning. *Plant Cell* **17**,  
683 2940-2953.
- 684 **Ohmori S, Kimizu M, Sugita M, Miyao A, Hirochika H, Uchida E, Nagato Y, Yoshida H.** 2009. MOSAIC  
685 FLORAL ORGANS1, an AGL6-like MADS box gene, regulates floral organ identity and meristem fate in  
686 rice. *Plant Cell* **21**, 3008-3025.
- 687 **Ohta M, Ohme-Takagi M, Shinshi H.** 2000. Three ethylene-responsive transcription factors in tobacco  
688 with distinct transactivation functions. *Plant J* **22**, 29-38.
- 689 **Overvoorde PJ, Okushima Y, Alonso JM, Chan A, Chang C, Ecker JR, Hughes B, Liu A, Onodera C,**  
690 **Quach H, Smith A, Yu G, Theologis A.** 2005. Functional genomic analysis of the  
691 AUXIN/INDOLE-3-ACETIC ACID gene family members in Arabidopsis thaliana. *Plant Cell* **17**, 3282-3300.
- 692 **Pelaz S, Ditta GS, Baumann E, Wisman E, Yanofsky MF.** 2000. B and C floral organ identity functions

- 693 require SEPALLATA MADS-box genes. *Nature* **405**, 200-203.
- 694 **Pinyopich A, Ditta GS, Savidge B, Liljegren SJ, Baumann E, Wisman E, Yanofsky MF.** 2003. Assessing  
695 the redundancy of MADS-box genes during carpel and ovule development. *Nature* **424**, 85-88.
- 696 **Prasad K, Parameswaran S, Vijayraghavan U.** 2005. OsMADS1, a rice MADS-box factor, controls  
697 differentiation of specific cell types in the lemma and palea and is an early-acting regulator of inner  
698 floral organs. *Plant J* **43**, 915-928.
- 699 **Seok HY, Park HY, Park JI, Lee YM, Lee SY, An G, Moon YH.** 2010. Rice ternary MADS protein  
700 complexes containing class B MADS heterodimer. *Biochem Biophys Res Commun* **401**, 598-604.
- 701 **Sitaraman J, Bui M, Liu Z.** 2008. LEUNIG\_HOMOLOG and LEUNIG perform partially redundant  
702 functions during Arabidopsis embryo and floral development. *Plant Physiol* **147**, 672-681.
- 703 **Sridhar VV, Surendrarao A, Gonzalez D, Conlan RS, Liu Z.** 2004. Transcriptional repression of target  
704 genes by LEUNIG and SEUSS, two interacting regulatory proteins for Arabidopsis flower development.  
705 *Proc Natl Acad Sci U S A* **101**, 11494-11499.
- 706 **Sridhar VV, Surendrarao A, Liu Z.** 2006. APETALA1 and SEPALLATA3 interact with SEUSS to mediate  
707 transcription repression during flower development. *Development* **133**, 3159-3166.
- 708 **Tanaka W, Pautler M, Jackson D, Hirano HY.** 2013. Grass meristems II: inflorescence architecture,  
709 flower development and meristem fate. *Plant Cell Physiol* **54**, 313-324.
- 710 **Tao J, Liang W, An G, Zhang D.** 2018. OsMADS6 Controls Flower Development by Activating Rice  
711 FACTOR OF DNA METHYLATION LIKE1. *Plant Physiol* **177**, 713-727.
- 712 **Theissen G, Saedler H.** 2001. Plant biology. Floral quartets. *Nature* **409**, 469-471.
- 713 **Thompson BE, Hake S.** 2009. Translational biology: from Arabidopsis flowers to grass inflorescence  
714 architecture. *Plant Physiol* **149**, 38-45.
- 715 **Wang H, Zhang L, Cai Q, Hu Y, Jin Z, Zhao X, Fan W, Huang Q, Luo Z, Chen M, Zhang D, Yuan Z.** 2015.  
716 OsMADS32 interacts with PI-like proteins and regulates rice flower development. *J Integr Plant Biol* **57**,  
717 504-513.
- 718 **Wang K, Tang D, Hong L, Xu W, Huang J, Li M, Gu M, Xue Y, Cheng Z.** 2010. DEP and AFO regulate  
719 reproductive habit in rice. *PLoS Genet* **6**, e1000818.
- 720 **Wang Y, Wang C, Zheng M, Lyu J, Xu Y, Li X, Niu M, Long W, Wang D, Wang H, Terzaghi W, Wang Y,  
721 Wan J.** 2016. WHITE PANICLE1, a Val-tRNA Synthetase Regulating Chloroplast Ribosome Biogenesis in  
722 Rice, Is Essential for Early Chloroplast Development. *Plant Physiol* **170**, 2110-2123.
- 723 **Weijers D, Wagner D.** 2016. Transcriptional Responses to the Auxin Hormone. *Annu Rev Plant Biol* **67**,  
724 539-574.
- 725 **Wu D, Liang W, Zhu W, Chen M, Ferrandiz C, Burton RA, Dreni L, Zhang D.** 2018. Loss of LOFSEP  
726 Transcription Factor Function Converts Spikelet to Leaf-Like Structures in Rice. *Plant Physiol* **176**,  
727 1646-1664.
- 728 **Yadav SR, Khanday I, Majhi BB, Veluthambi K, Vijayraghavan U.** 2011. Auxin-responsive OsMGH3, a  
729 common downstream target of OsMADS1 and OsMADS6, controls rice floret fertility. *Plant Cell Physiol*  
730 **52**, 2123-2135.
- 731 **Yamamoto Y, Kamiya N, Morinaka Y, Matsuoka M, Sazuka T.** 2007. Auxin biosynthesis by the YUCCA  
732 genes in rice. *Plant Physiol* **143**, 1362-1371.
- 733 **Yuan Z, Gao S, Xue DW, Luo D, Li LT, Ding SY, Yao X, Wilson ZA, Qian Q, Zhang DB.** 2009. RETARDED  
734 PALEA1 controls palea development and floral zygomorphy in rice. *Plant Physiol* **149**, 235-244.
- 735 **Yun D, Liang W, Dreni L, Yin C, Zhou Z, Kater MM, Zhang D.** 2013. OsMADS16 genetically interacts  
736 with OsMADS3 and OsMADS58 in specifying floral patterning in rice. *Mol Plant* **6**, 743-756.



737 **Zahn LM, Kong H, Leebens-Mack JH, Kim S, Soltis PS, Landherr LL, Soltis DE, Depamphilis CW, Ma H.**  
738 2005. The evolution of the SEPALLATA subfamily of MADS-box genes: a preangiosperm origin with  
739 multiple duplications throughout angiosperm history. *Genetics* **169**, 2209-2223.  
740 **Zhang D, Yuan Z.** 2014. Molecular control of grass inflorescence development. *Annu Rev Plant Biol* **65**,  
741 553-578.  
742 **Zhang J, Nallamilli BR, Mujahid H, Peng Z.** 2010. OsMADS6 plays an essential role in endosperm  
743 nutrient accumulation and is subject to epigenetic regulation in rice (*Oryza sativa*). *Plant J* **64**,  
744 604-617.

745 **Zhang Q, Xu J, Jiandi, Li Y, Yun.** 2007. Morphological, Anatomical and Genetic Analysis for a Rice. *Journal*  
746 *of Genetics and Genomics* **34**, 519-526.  
747 **Zhang S, Wu T, Liu S, Liu X, Jiang L, Wan J.** 2015. Disruption of OsARF19 is Critical for Floral Organ  
748 Development and Plant Architecture in Rice (*Oryza sativa* L.). *Plant Molecular Biology Reporter*, Vol. 34,  
749 748-760.  
750 **Zhao Y.** 2010. Auxin biosynthesis and its role in plant development. *Annu Rev Plant Biol* **61**, 49-64.  
751 **Zheng Y, Zhang K, Guo L, Liu X, Zhang Z.** 2018. AUXIN RESPONSE FACTOR3 plays distinct role during  
752 early flower development. *Plant Signal Behav* **13**, e1467690.  
753  
754

## 755 **Figure legend**

756 **Fig. 1** . Phenotypic characteristics of wild-type and *kkx*.

757 (A) Phenotype between wild-type and *kkx* at the post-heading stage. Scale bars = 50  
758 cm. (B) Phenotypes of mature seeds with and without seed coat of wild-type and *kkx*.  
759 Scale = 5 mm. (C) Spikelets phenotype of wild-type and *kkx* after removal of the  
760 palea. Scale bar = 3 mm. (D and E) Comparisons between wild-type and *kkx* in pistils  
761 (D) and mature anthers (E). Scale bar = 2 mm. (F and G) Pollen fertility of wild-type  
762 and *kkx* observed by staining with 1% I<sub>2</sub>-KI. Scale bar = 600 μm.

763

764 **Fig. 2.** Histological analysis of wild-type and *kkx* spikelets.

765 (A and D) Cross sections of spikelets showing five vascular bundles in the lemma  
766 (black asterisks) and three vascular bundles in the palea (red asterisks) in wild-type (A)  
767 and *kkx* (D). White lines indicate the mrp of paleas in wild-type (A) and *kkx* (D), red  
768 brackets indicate the bop of paleas of wild-type (A) and *kkx* (D). Scale bar = 500μm.  
769 (B-C and E-F) Cross sections of palea edges in wild-type (B and C) and *kkx* (E and F).  
770 Black asterisks indicate vascular bundles in the lemma, and red asterisks indicate  
771 vascular bundles in the palea. Scale bar = 300μm. (G-J) Scanning electron

772 micrographs (SEM) analysis of early spikelets of wild-type at different stages. (G)  
773 Sp6; (H) early Sp7; (I) Sp7; (J) Sp8. (K-N) Scanning electron micrographs of early  
774 spikelets of *kkx* at different stages. (K) Sp6; (L) early Sp7; (M) Sp7; and (N) Sp8.  
775 White square indicate the bulge on palea of *kkx*. White asterisks indicate the stamens  
776 in wild-type and *kkx* spikelets, respectively. pi, pistils; le, lemma; pa, palea. Scale bar,  
777 50 $\mu$ m in (G to N).

778

779 **Fig. 3.** Map-based cloning and identification of *KAIKOUXIAO* (*KKX*).

780 (A) *KKX* was preliminarily mapped between markers InterB and RM11322 on  
781 chromosome 1. (B) Fine-mapping of the *KKX* locus. *KKX* was positioned on  
782 chromosome 1 between BACs OSJNBa0090K04 and P0410E03 within a 36.8 kb  
783 region flanked by In-Del markers Y6 and Y10 using 513 mutant individuals. (C)  
784 Three predicted open reading frames are located in the 36.8 kb region. (D) Gene  
785 structure of candidate gene *LOC\_Os01g042260*. Black asterisk and black arrow  
786 indicate the position and differing amino acids in wild-type and *kkx*. (E-K)  
787 Characterisation of T<sub>0</sub> transgenic plants. Phenotypes of wild-type (E) and *RNAi* line  
788 (F) florets at the heading stage. Scale bar = 0.5 mm. (G) Relative expression levels of  
789 *LOC\_Os01g042260* in spikelets of wild-type and *RNAi* lines were detected by  
790 qRT-PCR, with data normalized to *UBQ* levels. Error bars indicate s.e.m. of the mean  
791 of 3 replicates. \*\*,  $P < 0.01$ , Student's *t* test. (H-K) Cross sections of *RNAi-4* (H and J)  
792 and *RNAi-6* (I and K) flower, respectively.

793

794 **Fig. 4.** Subcellular localization and expression pattern of OsLUGL.

795 (A) Subcellular localization of OsLUGL protein. Rice protoplast cell expressing  
796 OsLUGL-GFP. From left to right: GFP signal of the fusion protein, mCherry with  
797 nuclear location gene as a marker, bright field image and merged image. Scale bar, 1  
798 mm. (B) Tissue-specific expression pattern revealed by real-time PCR. RNA was  
799 isolated from various tissues of wild-type (left). S, seedlings; R, roots; SH, shoots; L,  
800 leaves; P, panicles; SP, young spikelets. Right image shows the relative mRNA  
801 expression of *OsLUGL* in spikelets at different developmental stages. Error bars

802 indicate s.e.m. of the mean of 3 replicates. (C) In situ hybridization of *OsLUGL*  
803 mRNA. Panicle development at early (1 and 3) and late (2 and 4) stages of panicle  
804 development. Antisense probe was used as the negative control (5). Scale bars, 1 mm  
805 in 1, 2 and 5; 100  $\mu$ m in 3; 200  $\mu$ m in 4. sm, spikelet meristem; v, vasculature; f, floret;  
806 le, lemma; pa, palea.

807

808 **Fig. 5.** Analysis of LUGL transcriptional regulation mechanism

809 (A) Yeast two-hybrid assays. Schematic representations indicate the truncated LUGL  
810 proteins as baits used for yeast two-hybrid assays. Different colored rectangles  
811 represent different domains of LUGL<sup>WT</sup> and LUGL<sup>kkx</sup> proteins. Yeast diploids were  
812 grown on agar plates DDO (-Leu/-Trp) and QDO (-Ade/-His/-Leu/-Trp), respectively.

813 (B) Analysis of interaction strength. Yeast diploids co-expressing Gal4 AD-SEU  
814 fusions and GAL4 BD- LUGL<sup>WT</sup> or GAL4 BD- LUGL<sup>kkx</sup> fusions were grown in  
815 selective liquid media to OD<sub>600</sub> = 1.0. Diploids were titrated (1, 0.1, 0.01; total 5  $\mu$ l)  
816 and plated on TDO (-His/-Leu/-Trp) and QDO (-Ade/-His/-Leu/-Trp) agar plates for  
817 growth. (C) Bimolecular fluorescence complementation (BiFC) assays showing that

818 LUGL interacts with SEU in the nuclei of leaf cells of *Nicotiana benthamiana*.  
819 Signals of enhanced yellow fluorescent protein (eYFP) were not detected in  
820 corresponding negative controls. ER marker (mCherry ER-rk CD3-959). Scale bar =  
821 20  $\mu$ m. (D) Diagrams of constructs used for transactivation assays. (E) Transient rice

822 protoplast repression assays using reporter 5 $\times$ UAS GAL4-LUC mixed with  
823 35S::RenillaLUC (REN). LUC/REN ratio was used to indicate reporter gene  
824 expression and to control transfection efficiency. The effectors in (D) were mixed  
825 with the reporter to co-transfect rice protoplasts. Data are means  $\pm$  s.e.m. (n=3). \*\*,  $P$

826 < 0.01, Student's  $t$  test. (F) Analysis of the interaction between SEU and  
827 AP1(OsMADS14/15/18)/SEP1(OsMADS8) genes using yeast two-hybrid assays.  
828 Yeast diploids were grown on agar plates DDO (-Leu/-Trp), TDO (-His/-Leu/-Trp)  
829 and QDO (-Ade/-His/-Leu/-Trp), respectively.

830

831 **Fig. 6.** The expression level of floral organ development genes in young

832 inflorescences (15 mm) of wild-type and *kkx*, respectively.

833 (A) Expression of A-class genes (*OsMADS14*, *OsMADS15* and *OsMADS18*), B-class  
834 genes (*OsMADS2* and *OsMADS16*), C-class genes (*OsMADS3*, *OsMADS58* and *DL*),  
835 D-class genes (*OsMADS13*) and *REPI*. (B) Expression of E-class genes (*OsMADS1*,  
836 *OsMADS6*, *OsMADS7*, *OsMADS8*, *OsCFO1*, *OsMADS22*, *OsMADS34*, *OsMADS29*  
837 and *OsMADS57*). Data are given as means  $\pm$  s.e.m. (n=3). \* and \*\*,  $P < 0.05$  and  $0.01$ ,  
838 respectively, Student's *t* test.

839

840 **Fig. 7.** OsMADSs promote the expression of *OsGH3-8* and change the level of auxin  
841 level.

842 (A) Yeast one-hybrid (Y1H) analysis of OsMADS6, OsMADS8, OsMADS18 and  
843 *OsGH3-8* promoter., *OsGH3-8* as the bait vector which promoter fragment-fused lacZ  
844 reporter, and the prey vectors containing OsMADS6/8/18-fused GAL1 activation  
845 domain. Two vectors were co-transformed into EGY48. (B) Diagrams of constructs  
846 used for transactivation assays. (C) Transient expression assays of *OsGH3-8*  
847 transcriptional activity modulated by OsMADS8, OsMADS18 and  
848 OsMADS8+OsMADS18 respectively in rice protoplasts. *pOsGH3-8:LUC* was  
849 co-transformed with either the effector or empty vector, as control, into rice  
850 protoplasts.. LUC/REN indicating the level of *OsGH3-8* expression activated by the  
851 effectors mentioned before. (D) Expression of IAA relative genes. (E) The level of  
852 auxin in young inflorescences (15 mm). Data in (C-E) are given as means  $\pm$  s.e.m.  
853 (n=3). \* and \*\*,  $P < 0.05$  and  $0.01$ , respectively, Student's *t* test.

854

## Figures

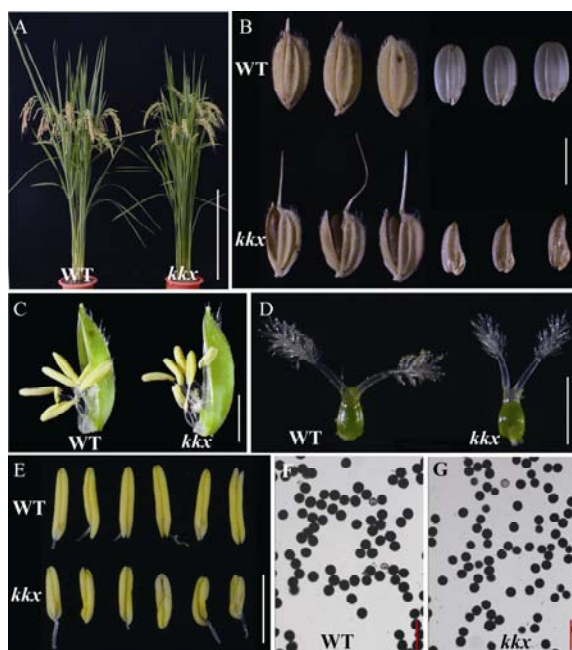

**Fig. 1** . Phenotypic characteristics of wild-type and *kcx*.

(A) Phenotype between wild-type and *kcx* at the post-heading stage. Scale bars = 50 cm. (B) Phenotypes of mature seeds with and without seed coat of wild-type and *kcx*. Scale = 5 mm. (C) Spikelets phenotype of wild-type and *kcx* after removal of the palea. Scale bar = 3 mm. (D and E) Comparisons between wild-type and *kcx* in pistils (D) and mature anthers (E). Scale bar = 2 mm. (F and G) Pollen fertility of wild-type and *kcx* observed by staining with 1% I<sub>2</sub>-KI. Scale bar = 600 μm.

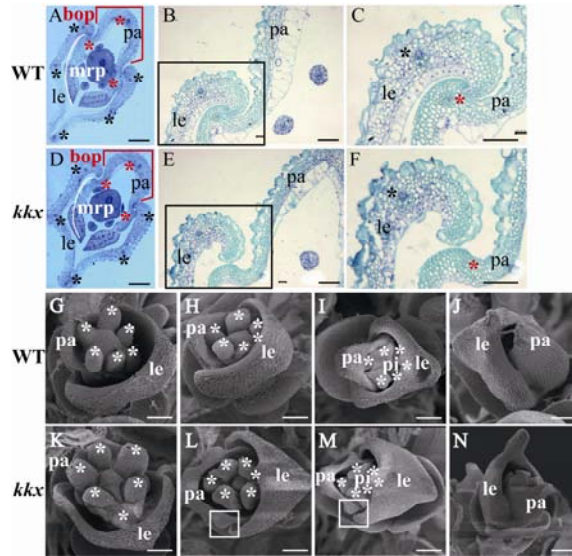

**Fig. 2.** Histological analysis of wild-type and *kcx* spikelets.

(A and D) Cross sections of spikelets showing five vascular bundles in the lemma (black asterisks) and three vascular bundles in the palea (red asterisks) in wild-type (A) and *kcx* (D). White lines indicate the mrip of paleas in wild-type (A) and *kcx* (D), red brackets indicate the bop of paleas of wild-type (A) and *kcx* (D). Scale bar = 500µm. (B-C and E-F) Cross sections of palea edges in wild-type (B and C) and *kcx* (E and F). Black asterisks indicate vascular bundles in the lemma, and red asterisks indicate vascular bundles in the palea. Scale bar = 300µm. (G-J) Scanning electron micrographs (SEM) analysis of early spikelets of wild-type at different stages. (G) Sp6; (H) early Sp7; (I) Sp7; (J) Sp8. (K-N) Scanning electron micrographs of early spikelets of *kcx* at different stages. (K) Sp6; (L) early Sp7; (M) Sp7; and (N) Sp8. White square indicate the bulge on palea of *kcx*. White asterisks indicate the stamens in wild-type and *kcx* spikelets, respectively. pi, pistils; le, lemma; pa, palea. Scale bar, 50µm in (G to N).

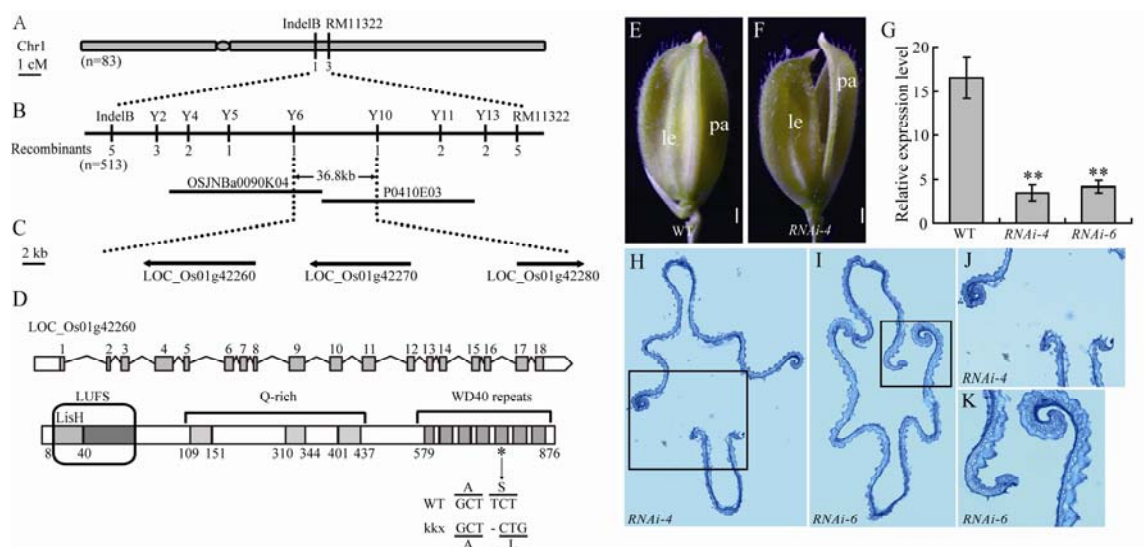

**Fig. 3.** Map-based cloning and identification of *KAIKOUXIAO* (*KKX*).

(A) *KKX* was preliminarily mapped between markers InterB and RM11322 on chromosome 1. (B) Fine-mapping of the *KKX* locus. *KKX* was positioned on chromosome 1 between BACs OSJNBa0090K04 and P0410E03 within a 36.8 kb region flanked by In-Del markers Y6 and Y10 using 513 mutant individuals. (C) Three predicted open reading frames are located in the 36.8 kb region. (D) Gene structure of candidate gene *LOC\_Os01g042260*. Black asterisk and black arrow indicate the position and differing amino acids in wild-type and *kkx*. (E-K) Characterisation of T<sub>0</sub> transgenic plants. Phenotypes of wild-type (E) and *RNAi* line (F) florets at the heading stage. Scale bar = 0.5 mm. (G) Relative expression levels of *LOC\_Os01g042260* in spikelets of wild-type and *RNAi* lines were detected by qRT-PCR, with data normalized to *UBQ* levels. Error bars indicate s.e.m. of the mean of 3 replicates. \*\*,  $P < 0.01$ , Student's *t* test. (H-K) Cross sections of *RNAi-4* (H and J) and *RNAi-6* (I and K) flower, respectively.



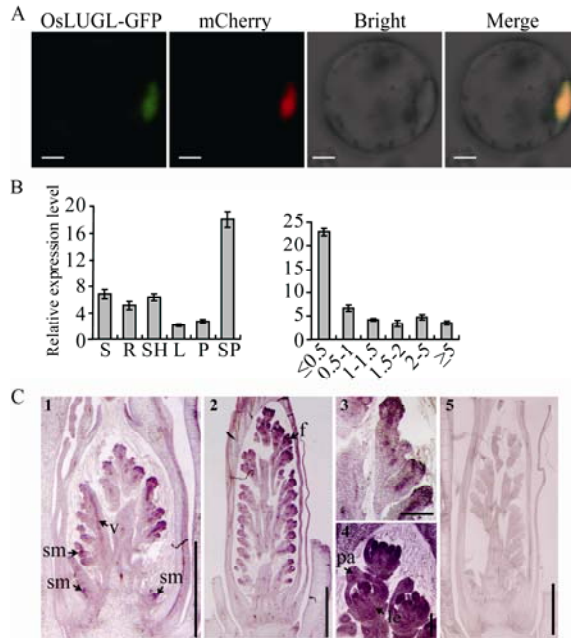

**Fig. 4.** Subcellular localization and expression pattern of *OsLUGL*.

(A) Subcellular localization of *OsLUGL* protein. Rice protoplast cell expressing *OsLUGL*-GFP. From left to right: GFP signal of the fusion protein, mCherry with nuclear location gene as a marker, bright field image and merged image. Scale bar, 1 mm. (B) Tissue-specific expression pattern revealed by real-time PCR. RNA was isolated from various tissues of wild-type (left). S, seedlings; R, roots; SH, shoots; L, leaves; P, panicles; SP, young spikelets. Right image shows the relative mRNA expression of *OsLUGL* in spikelets at different developmental stages. Error bars indicate s.e.m. of the mean of 3 replicates. (C) In situ hybridization of *OsLUGL* mRNA. Panicle development at early (1 and 3) and late (2 and 4) stages of panicle development. Antisense probe was used as the negative control (5). Scale bars, 1 mm in 1, 2 and 5; 100 μm in 3; 200 μm in 4. sm, spikelet meristem; v, vasculature; f, floret; le, lemma; pa, palea.



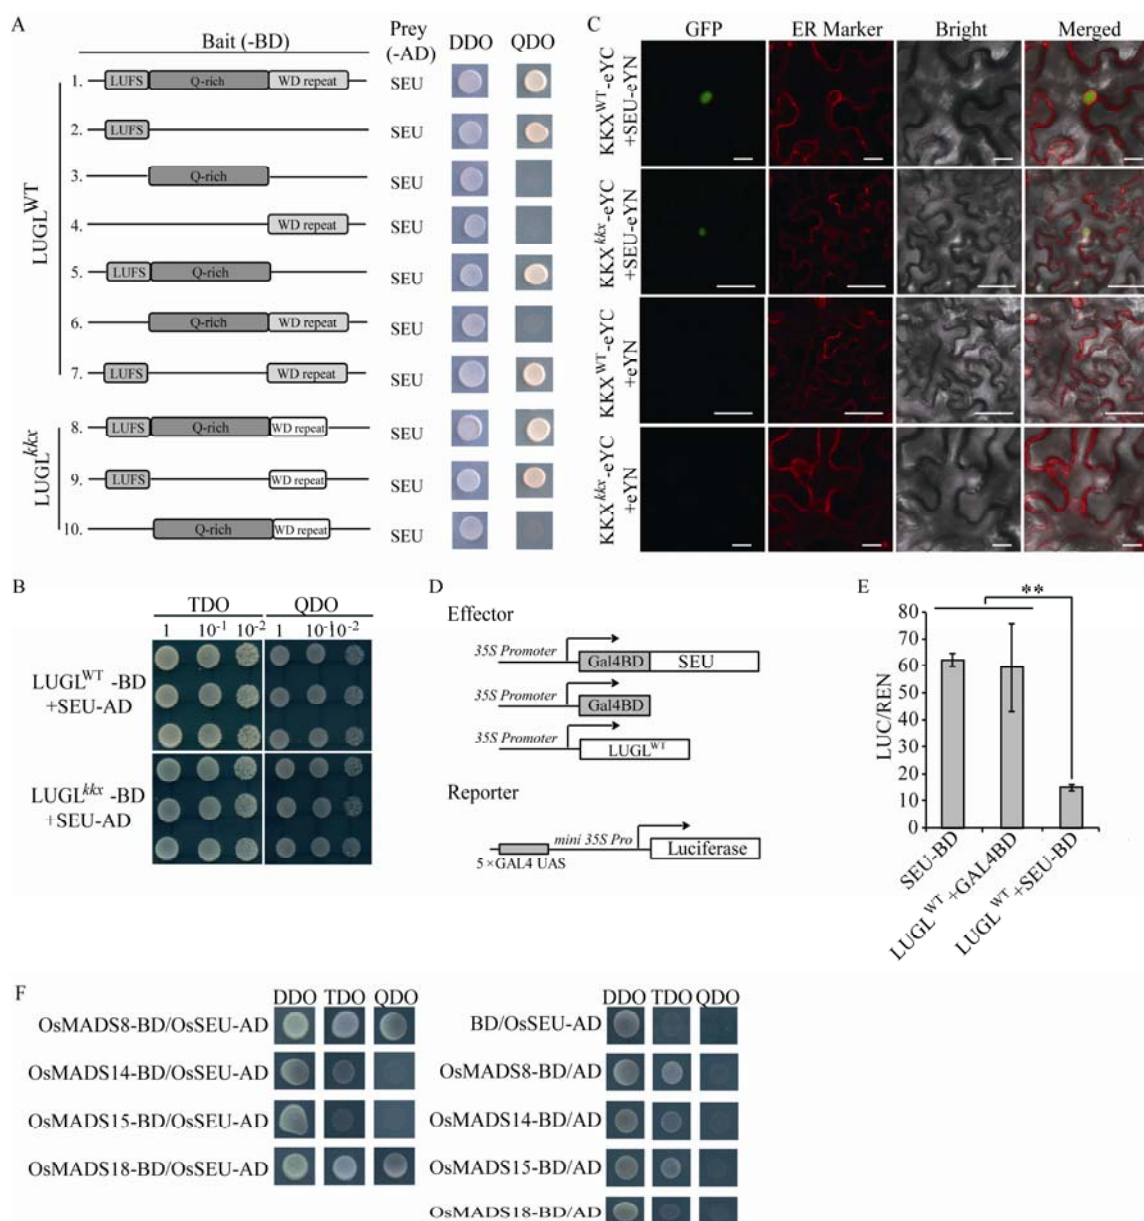

**Fig. 5.** Analysis of LUGL transcriptional regulation mechanism

(A) Yeast two-hybrid assays. Schematic representations indicate the truncated LUGL proteins as baits used for yeast two-hybrid assays. Different colored rectangles represent different domains of LUGL<sup>WT</sup> and LUGL<sup>kkx</sup> proteins. Yeast diploids were grown on agar plates DDO (-Leu/-Trp) and QDO (-Ade/-His/-Leu/-Trp), respectively.

(B) Analysis of interaction strength. Yeast diploids co-expressing Gal4 AD-SEU fusions and GAL4 BD- LUGL<sup>WT</sup> or GAL4 BD- LUGL<sup>kkx</sup> fusions were grown in selective liquid media to OD600 = 1.0. Diploids were titrated (1, 0.1, 0.01; total 5  $\mu$ l)

and plated on TDO (-His/-Leu/-Trp) and QDO (-Ade/-His/-Leu/-Trp) agar plates for growth. (C) Bimolecular fluorescence complementation (BiFC) assays showing that LUGL interacts with SEU in the nuclei of leaf cells of *Nicotiana benthamiana*. Signals of enhanced yellow fluorescent protein (eYFP) were not detected in corresponding negative controls. ER marker (mCherry ER-rk CD3-959). Scale bar = 20  $\mu$ m. (D) Diagrams of constructs used for transactivation assays. (E) Transient rice protoplast repression assays using reporter 5 $\times$ UAS GAL4-LUC mixed with 35S::RenillaLUC (REN). LUC/REN ratio was used to indicate reporter gene expression and to control transfection efficiency. The effectors in (D) were mixed with the reporter to co-transfect rice protoplasts. Data are means  $\pm$  s.e.m. (n=3). \*\*,  $P < 0.01$ , Student's  $t$  test. (F) Analysis of the interaction between SEU and AP1(OsMADS14/15/18)/SEP1(OsMADS8) genes using yeast two-hybrid assays. Yeast diploids were grown on agar plates DDO (-Leu/-Trp), TDO (-His/-Leu/-Trp) and QDO (-Ade/-His/-Leu/-Trp), respectively.

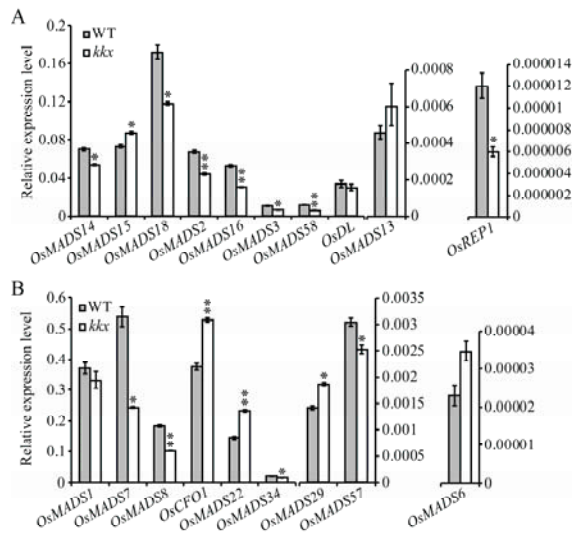

**Fig. 6.** The expression level of floral organ development genes in young inflorescences (15 mm) of wild-type and *ktx*, respectively.

(A) Expression of A-class genes (*OsMADS14*, *OsMADS15* and *OsMADS18*), B-class genes (*OsMADS2* and *OsMADS16*), C-class genes (*OsMADS3*, *OsMADS58* and *DL*), D-class genes (*OsMADS13*) and *REP1*. (B) Expression of E-class genes (*OsMADS1*, *OsMADS6*, *OsMADS7*, *OsMADS8*, *OsCFO1*, *OsMADS22*, *OsMADS34*, *OsMADS29* and *OsMADS57*). Data are given as means  $\pm$  s.e.m. (n=3). \* and \*\*,  $P < 0.05$  and  $0.01$ , respectively, Student's *t* test.

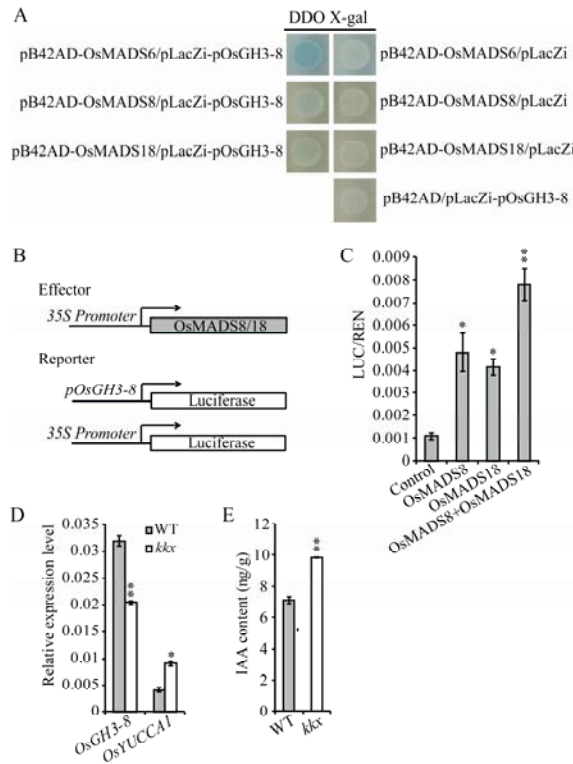

**Fig. 7.** OsMADSs promote the expression of *OsGH3-8* and change the level of auxin level.

(A) Yeast one-hybrid (Y1H) analysis of OsMADS6, OsMADS8, OsMADS18 and *OsGH3-8* promoter., *OsGH3-8* as the bait vector which promoter fragment-fused lacZ reporter, and the prey vectors containing OsMADS6/8/18-fused GAL1 activation domain. Two vectors were co-transformed into EGY48. (B) Diagrams of constructs used for transactivation assays. (C) Transient expression assays of *OsGH3-8* transcriptional activity modulated by OsMADS8, OsMADS18 and OsMADS8+OsMADS18 respectively in rice protoplasts. *pOsGH3-8*:LUC was co-transformed with either the effector or empty vector, as control, into rice protoplasts. LUC/REN indicating the level of *OsGH3-8* expression activated by the effectors mentioned before. (D) Expression of IAA relative genes. (E) The level of auxin in young inflorescences (15 mm). Data in (C-E) are given as means  $\pm$  s.e.m. (n=3). \* and \*\*, P<0.05 and 0.01, respectively, Student's *t* test.
